# Supplementary material for: Sequence regulation in living anionic terpolymerization of styrene and two categories of 1,1-diphenylethylene (DPE) derivatives
Source: Royal Society of Chemistry journal article supplement (doi:10.1039/d0py00731e), 2020-01-01
Supplement: d0py00731e1.pdf [file d0py00731e1.pdf]

## Sequence Regulation in Living Anionic Terpolymerization of Styrene and Two Categories of 1,1-Diphenylethylene (DPE) Derivatives

Lincan Yang<sup>+</sup>, Heyu Shen<sup>+</sup>, Li Han, Hongwei Ma<sup>\*</sup>, Chao Li, Lan Lei, Songbo Zhang,  
Pibo Liu, Yang Li<sup>\*</sup>

Department of Polymer Science and Engineering, School of Chemical Engineering,  
Dalian University of Technology, Dalian 116024, China

<sup>+</sup> co-first authors

<sup>\*</sup>E-mail: [mahw@dlut.edu.cn](mailto:mahw@dlut.edu.cn), [liyang@dlut.edu.cn](mailto:liyang@dlut.edu.cn)

Table S1 Results of the block terpolymers of DPE-yne/DPE-ene/St with two-step feeding

| Entry <sup>a</sup>                                      | $[D_{yne}]_0/[D_{ene}]_0/[St]_0$ <sup>b</sup> | $M_n$ <sup>c</sup><br>kg mol <sup>-1</sup> | PDI <sup>c</sup> | $N_{D-yne}/N_{D-ene}/N_{St}$ <sup>d</sup> | $N_{D-yne}$ <sup>e</sup> | $N_{D-ene}$ <sup>e</sup> | $N_{St}$ <sup>e</sup> |
|---------------------------------------------------------|-----------------------------------------------|--------------------------------------------|------------------|-------------------------------------------|--------------------------|--------------------------|-----------------------|
| P(D <sub>yne</sub> /St)                                 | 1/0/1                                         | 3.3                                        | 1.20             | 1.0/-/1.07                                | 8.5                      | -                        | 9.1                   |
| P(D <sub>yne</sub> /St- <i>b</i> -D <sub>ene</sub> /St) | 1/1/2.5                                       | 7.4                                        | 1.61             | 1.23/1.0/3.12                             | 10.0                     | 8.1                      | 25.3                  |

a) Terpolymerizations of DPE-yne/DPE-ene/St *via* a strategy that first DPE-yne was fed and followed DPE-ene was fed. b) Monomer feed ratio. c) Determined by SEC. d) Average numbers ratio of each monomer in chain, calculated from the <sup>1</sup>H NMR spectra of the corresponding polymer. e) Average numbers of each monomer units in the final polymer chain (eqn S1-3).

Eqn S1-3 are used for the calculation of average numbers of each monomer units in the DPE-yne/DPE-ene/St terpolymers.

$$\frac{2N_{Dene}}{9N_{Dyne} + 9N_{Dene} + 5N_{St}} = \frac{Area(b)}{Area(a) - \frac{1}{2}Area(b)} \quad (1)$$

$$\frac{9N_{Dyne}}{2N_{Dene}} = \frac{Area(d)}{Area(b)} \quad (2)$$

$$MW_{St} \times N_{St} + MW_{Dyne} \times N_{Dyne} + MW_{Dene} \times N_{Dene} = \bar{M}_n \quad (3)$$

Eqn S4-6 are used for the calculation of average numbers of each monomer units in the DPE-(SiH/OMe)/DPE-NSi<sub>2</sub>/St terpolymers.

$$\frac{3N_{DSiH/OMe}}{8N_{DSiH/OMe} + 9N_{DNSi2} + 5N_{St}} = \frac{Area(c)}{Area(a)} \quad (4)$$

$$\frac{3N_{DSiH/OMe}}{18N_{DNSi2}} = \frac{Area(c)}{Area(e)} \quad (5)$$

$$MW_{St} \times N_{St} + MW_{DSiH/OMe} \times N_{DSiH/OMe} + MW_{DNSi2} \times N_{DNSi2} = \bar{M}_n \quad (6)$$

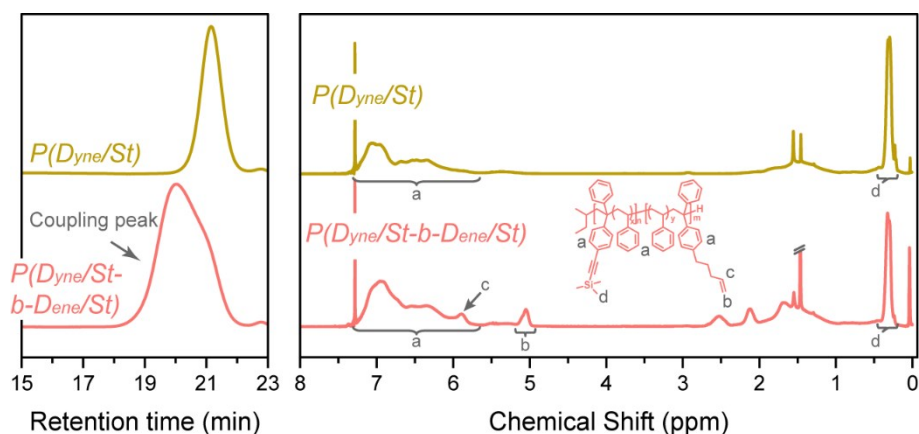

Figure S1 SEC curves and  $^1\text{H}$  NMR spectra (in  $\text{CDCl}_3$ ) of DPE-yne/DPE-ene/St block terpolymers that were synthesized based on a strategy that first DPE-yne was fed and followed DPE-ene was fed.

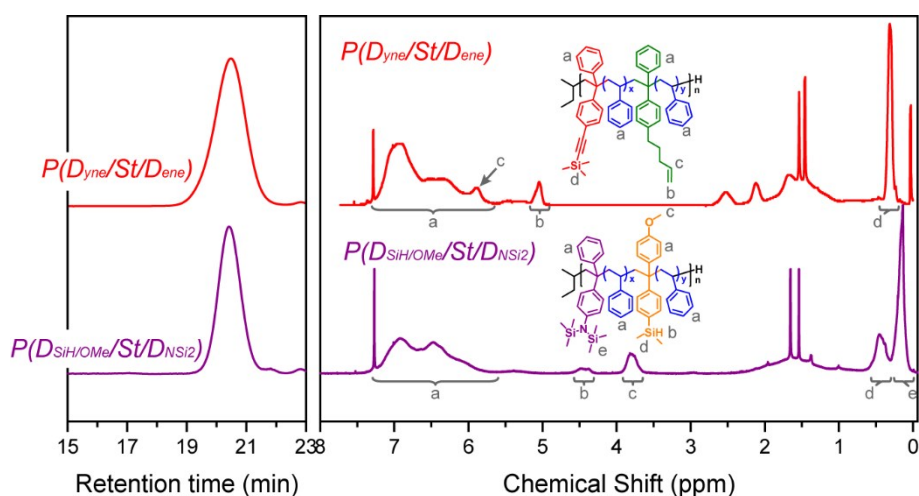

Figure S2 SEC curves and  $^1\text{H}$  NMR spectra (in  $\text{CDCl}_3$ ) of *in situ*  $^1\text{H}$  NMR monitoring of DPE-yne/DPE-ene/St and DPE-(SiH/OMe)/DPE-NSi<sub>2</sub>/St terpolymerizations *via* one-pot feeding method.

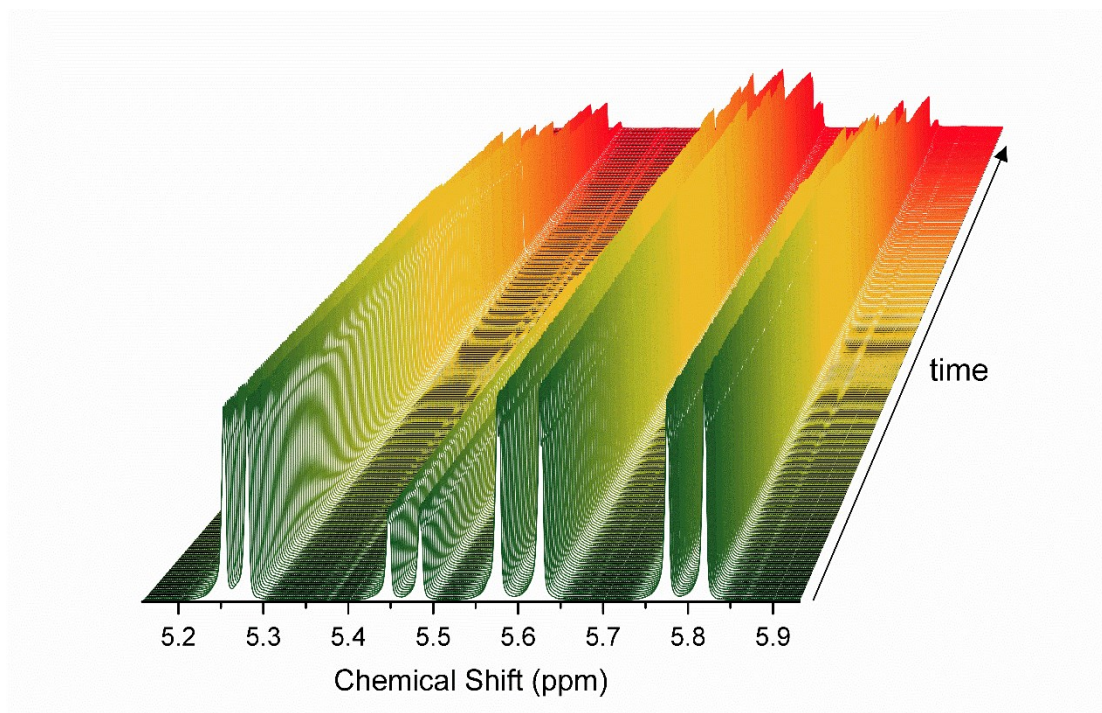

Figure S3 Stacked overlay of all the *in situ*  $^1\text{H}$  NMR spectra of DPE-yne/DPE-ene/St terpolymerization *via* one-pot feeding method.

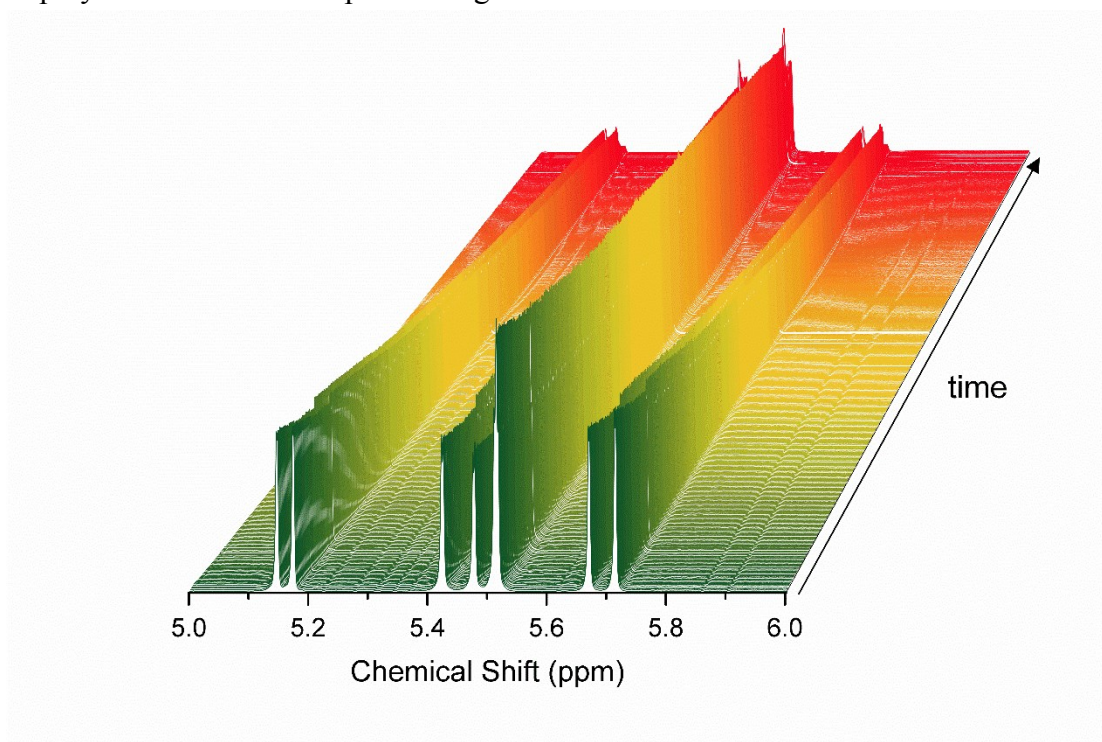

Figure S4 Stacked overlay of all the *in situ*  $^1\text{H}$  NMR spectra of DPE-(SiH/OMe)/DPE-NSi<sub>2</sub>/St terpolymerization *via* one-pot feeding method.
